# Supplementary material
Source: PubMed Central journal article supplement (PMC3911649)
Supplement: JVI.02361-13_zjv999098577so1.pdf [file JVI.02361-13_zjv999098577so1.pdf]

**Supplemental Table 1: Peptides and variants tested.**

| <b>Peptide</b> | <b>Sequence</b> | <b>Peptide</b> | <b>Sequence</b> |
|----------------|-----------------|----------------|-----------------|
| 1a             | MGARASVLSGG     | 222a           | PIAPGQMRREPR    |
| 1b             | MGARASILSGG     | 222b           | PVAPGQMRREPR    |
| 2a             | GARASVLSGGE     | 222c           | PVAPGQMRDPR     |
| 2b             | GARASVLSGGK     | 222d           | PIAPGQIREPR     |
| 2c             | GARASVLSGGQ     | 223a           | IAPGQMRREPRG    |
| 2d             | GARASILSGGE     | 223b           | VAPGQMRREPRG    |
| 3a             | ARASVLSGGEL     | 223c           | VAPGQMRDPRG     |
| 3b             | ARASVLSGGKL     | 223d           | IAPGQIREPRG     |
| 3c             | ARASVLSGGQL     | 224a           | APGQMRREPRGS    |
| 3d             | ARASILSGGEL     | 224b           | APGQIREPRGS     |
| 4a             | RASVLSGGELD     | 224c           | APGQMRDPRGS     |
| 4b             | RASVLSGGKLD     | 225a           | PGQMRREPRGSD    |
| 4c             | RASVLSGGQLD     | 225b           | PGQIREPRGSD     |
| 4d             | RASILSGGELD     | 225c           | PGQMRDPRGSD     |
| 5a             | ASVLSGGELDR     | 226a           | GQMRREPRGSDI    |
| 5b             | ASVLSGGELDK     | 226b           | GQIREPRGSDI     |
| 5c             | ASVLSGGQLDR     | 226c           | GQMRDPRGSDI     |
| 5d             | ASVLSGGKLDLDR   | 227a           | QMRREPRGSDIA    |
| 5e             | ASILSGGELDR     | 227b           | QIREPRGSDIA     |
| 6a             | SVLSGGELDRW     | 227c           | QMRDPRGSDIA     |
| 6b             | SVLSGGELDKW     | 228a           | MREPRGSDIAG     |
| 6c             | SVLSGGQLDRW     | 228b           | IREPRGSDIAG     |
| 6d             | SVLSGGKLDKW     | 228c           | MRDPRGSDIAG     |
| 6e             | SVLSGGKLDLDRW   | 229a           | REPRGSDIAGT     |
| 7a             | VLSGGELDRWE     | 229b           | RDPRGSDIAGT     |
| 7b             | VLSGGELDKWE     | 229c           | REPRGSDIAGS     |
| 7c             | VLSGGKLDLDRWE   | 230a           | EPRGSDIAGTT     |
| 7d             | VLSGGKLDKWE     | 230b           | DPRGSDIAGTT     |
| 7e             | VLSGGQLDRWE     | 230c           | EPRGSDIAGST     |
| 8a             | LSGGELDRWEK     | 231a           | PRGSDIAGTTS     |
| 8b             | LSGGKLDLDRWEK   | 231b           | PRGSDIAGSTS     |
| 8c             | LSGGELDKWEK     | 232a           | RGSDIAGTTST     |
| 8d             | LSGGQLDRWEK     | 232b           | RGSDIAGTTSN     |
| 8e             | LSGGKLDKWEK     | 232c           | RGSDIAGSTST     |
| 9a             | SGGELDRWEKI     | 233a           | GSDIAGTTSTL     |
| 9b             | SGGKLDLDRWEKI   | 233b           | GSDIAGTTSNL     |
| 9c             | SGGELDKWEKI     | 233c           | GSDIAGSTSTL     |
| 9d             | SGGQLDRWEKI     | 234a           | SDIAGTTSTLQ     |
| 9e             | SGGKLDKWEKI     | 234b           | SDIAGTTSNLQ     |
| 10a            | GGELDRWEKIR     | 234c           | SDIAGSTSTLQ     |
| 10b            | GGKLDLDRWEKIR   | 235a           | DIAGTTSTLQEQ    |
| 10c            | GGELDKWEKIR     | 235b           | DIAGTTSNLQEQ    |
| 10d            | GGQLDRWEKIR     | 235c           | DIAGSTSTLQEQ    |
| 10e            | GGKLDKWEKIR     | 236a           | IAGTTSTLQEQ     |
| 11a            | GELDRWEKIRL     | 236b           | IAGTTSNLQEQ     |
| 11b            | GELDKWEKIRL     | 236c           | IAGSTSTLQEQ     |
| 11c            | GKLDLDRWEKIRL   | 237a           | AGTTSTLQEQI     |
| 11d            | GQLDRWEKIRL     | 237b           | AGTTSNLQEQI     |
| 11e            | GKLDKWEKIRL     | 238a           | GTTSTLQEQIG     |
| 12a            | ELDRWEKIRLR     | 238b           | GTTSTLQEQIA     |

**Supplemental Table 1: Peptides and variants tested.**

|     |             |      |              |
|-----|-------------|------|--------------|
| 12b | ELDKWEKIRLR | 239a | TTSTLQEQIGW  |
| 12c | KLDRWEKIRLR | 239b | TTSTLQEQIAW  |
| 12d | QLDRWEKIRLR | 240a | TSTLQEQIGWM  |
| 12e | KLDKWEKIRLR | 240b | TSTLQEQIAWM  |
| 13a | LDRWEKIRLRP | 241a | STLQEQIGWMT  |
| 13b | LDKWEKIRLRP | 241b | STLQEQIAWMT  |
| 14a | DRWEKIRLRPG | 242a | TLQEQIGWMTN  |
| 14b | DKWEKIRLRPG | 242b | TLQEQIGWMTS  |
| 15a | RWEKIRLRPGG | 242c | TLQEQIGWMTH  |
| 15b | KWEKIRLRPGG | 242d | TLQEQIAWMTN  |
| 16a | WEKIRLRPGGK | 243a | LQEQIGWMTNN  |
| 16b | WERIRLRPGGK | 243b | LQEQIGWMTSN  |
| 16c | WEKIRLRPGGR | 243c | LQEQIAWMTNN  |
| 17a | EKIRLRPGGKK | 243d | LQEQIGWMTHN  |
| 17b | ERIRLRPGGKK | 244a | QEQIGWMTNNP  |
| 17c | EKIRLRPGGRK | 244b | QEQIGWMTSNP  |
| 18a | KIRLRPGGKKK | 244c | QEQIAWMTNNP  |
| 18b | KIRLRPGGKKQ | 244d | QEQIGWMTHNP  |
| 18c | KIRLRPGGKKR | 245a | EQIGWMTNNPP  |
| 18d | RIRLRPGGKKK | 245b | EQIGWMTSNPP  |
| 19a | IRLRPGGKKKY | 245c | EQIGWMTHNPP  |
| 19b | IRLRPGGKKQY | 245d | EQIAWMTNNPP  |
| 19c | IRLRPGGKKRY | 246a | QIGWMTNNPPI  |
| 20a | RLRPGGKKKYK | 246b | QIGWMTSNPPI  |
| 20b | RLRPGGKKKYR | 246c | QIGWMTHNPPPI |
| 20c | RLRPGGKKKYQ | 246d | QIAWMTNNPPI  |
| 20d | RLRPGGKKQYK | 247a | IGWMTNNPPIP  |
| 20e | RLRPGGKKQYR | 247b | IGWMTSNPPIP  |
| 21a | LRPGGKKKYKL | 247c | IGWMTHNPPIP  |
| 21b | LRPGGKKKYRL | 247d | IAWMTNNPPIP  |
| 21c | LRPGGKKKYQL | 248a | GWMTNNPPIP   |
| 21d | LRPGGKKQYKL | 248b | GWMTSNPPIP   |
| 21e | LRPGGKKQYRL | 248c | GWMTSNPPIP   |
| 22a | RPGGKKKYK   | 248d | AWMTNNPPIP   |
| 22b | RPGGKKKYRLK | 249a | WMTNNPPIP    |
| 22c | RPGGKKKYQLK | 249b | WMTSNPPIP    |
| 22d | RPGGKKQYK   | 249c | WMTHNPIP     |
| 22e | RPGGKKQYRLK | 250a | MTNNPIP      |
| 23a | PGGKKKYKLKH | 250b | MTSNPIP      |
| 23b | PGGKKKYRLKH | 250c | MTHNPIP      |
| 23c | PGGKKKYQLKH | 251a | TNNPIP       |
| 23d | PGGKKQYKLKH | 251b | TSNPIP       |
| 23e | PGGKKQYRLKH | 251c | THNPIP       |
| 24a | GGKKKYKLKHI | 252a | NNPIP        |
| 24b | GGKKKYRLKHI | 252b | SNPIP        |
| 24c | GGKKKYQLKHI | 252c | HNPIP        |
| 24d | GGKKQYKLKHI | 253a | NPIP         |
| 24e | GGKKYRLKHL  | 253b | NPIP         |
| 25a | GKKKYKLKHIV | 254a | PIP          |
| 25b | GKKKYRLKHIV | 254b | PIP          |
| 25c | GKKQYKLKHIV | 255a | PIP          |

**Supplemental Table 1: Peptides and variants tested.**

|     |             |      |              |
|-----|-------------|------|--------------|
| 25d | GKKKYQLKHIV | 255b | PIPVGDIYKRW  |
| 26a | KKKYKLKHIVW | 256a | IPVGEIYKRWI  |
| 26b | KKKYRLKHIVW | 256b | IPVGDYIYKRWI |
| 26c | KKKYQLKHIVW | 257a | PVGEIYKRWII  |
| 26d | KKQYKLKHIVW | 257b | PVGDYIYKRWII |
| 26e | KKKYRLKHLVW | 258a | VGEIYKRWIIIL |
| 27a | KKYKLKHIVWA | 258b | VGEIYKRWIIM  |
| 27b | KKYRLKHIVWA | 259a | GEIYKRWIIILG |
| 27c | KKYQLKHIVWA | 259b | GEIYKRWIIMG  |
| 27d | KQYKLKHIVWA | 260a | EIYKRWIIILGL |
| 27e | KKYRLKHLVWA | 260b | EIYKRWIIMGL  |
| 27f | KRYKLKHIVWA | 261a | IYKRWIIILGLN |
| 28a | KYKLKHIVWAS | 261b | IYKRWIIMGLN  |
| 28b | KYRLKHIVWAS | 262a | YKRWIIILGLNK |
| 28c | QYKLKHIVWAS | 262b | YKRWIIMGLNK  |
| 28d | KYQLKHIVWAS | 263a | KRWIIILGLNKI |
| 28e | KYRLKHLVWAS | 263b | KRWIIMGLNKI  |
| 28f | RYKLKHIVWAS | 264a | RWIIILGLNKIV |
| 29a | YKLKHIVWASR | 264b | RWIIMGLNKIV  |
| 29b | YRLKHIVWASR | 265a | WIILGLNKIVR  |
| 29c | YQLKHIVWASR | 265b | WIIMGLNKIVR  |
| 29d | YRLKHLVWASR | 266a | IILGLNKIVRM  |
| 29e | YKLKHLVWASR | 266b | IIMGLNKIVRM  |
| 30a | KLKHIVWASRE | 267a | ILGLNKIVRMY  |
| 30b | RLKHIVWASRE | 267b | IMGLNKIVRMY  |
| 30c | QLKHIVWASRE | 268a | LGLNKIVRMYS  |
| 30d | RLKHLVWASRE | 268b | MGLNKIVRMYS  |
| 30e | KLKHLVWASRE | 269  | GLNKIVRMYSP  |
| 31a | LKHIVWASREL | 270a | LNKIVRMYSP   |
| 31b | LKHLVWASREL | 270b | LNKIVRMYSPV  |
| 32a | KHIVWASRELE | 271a | NKIVRMYSP    |
| 32b | KHLVWASRELE | 271b | NKIVRMYSPV   |
| 33a | HIVWASRELER | 272a | KIVRMYSP     |
| 33b | HLVWASRELER | 272b | KIVRMYSPV    |
| 34a | IVWASRELERF | 273a | IVRMYSP      |
| 34b | LVWASRELERF | 273b | IVRMYSPV     |
| 35  | VWASRELERFA | 274a | VRMYSP       |
| 36a | WASRELERFAV | 274b | VRMYSPV      |
| 36b | WASRELERFAL | 275a | RMYSPTS      |
| 37a | ASRELERFAVN | 275b | RMYSPTS      |
| 37b | ASRELERFALN | 276a | MYSPTS       |
| 38a | SRELERFAVNP | 276b | MYSPTS       |
| 38b | SRELERFALNP | 276c | MYSPTS       |
| 39  | RELERFAVNPG | 277a | YSPTS        |
| 40  | ELERFAVNPG  | 277b | YSPTS        |
| 41  | LERFAVNPG   | 277c | YSPTS        |
| 42  | ERFAVNPG    | 278a | SPTS         |
| 43a | RFAVNPG     | 278b | SPTS         |
| 43b | RFALNPG     | 278c | SPVS         |
| 44a | FAVNPG      | 279a | PTS          |
| 44b | FAVNPG      | 279b | PTS          |

**Supplemental Table 1: Peptides and variants tested.**

|     |              |      |             |
|-----|--------------|------|-------------|
| 45a | AVNPGLLETSE  | 279c | PVSILDIRQGP |
| 45b | AVNPGLLETAE  | 280a | TSILDIRQGPK |
| 45c | AVNPGLLETSG  | 280b | TSILDIKQGPK |
| 46a | VNPGLLETSEG  | 280c | VSILDIRQGPK |
| 46b | VNPGLLETAEG  | 281a | SILDIRQGPKE |
| 46c | VNPGLLETSSG  | 281b | SILDIKQGPKE |
| 47a | NPGLLETSEGC  | 282a | ILDIRQGPKEP |
| 47b | NPGLLETAEGC  | 282b | ILDIKQGPKEP |
| 47c | NPGLLETSSGGC | 283a | LDIRQGPKEPF |
| 48a | PGLLETSEGCR  | 283b | LDIKQGPKEPF |
| 48b | PGLLETAEGCR  | 284a | DIRQGPKEPFR |
| 48c | PGLLETSSGCR  | 284b | DIKQGPKEPFR |
| 48d | PGLLETSEGCK  | 285a | IRQGPKEPFRD |
| 49a | GLLETSEGCRQ  | 285b | IKQGPKEPFRD |
| 49b | GLLETAEGCRQ  | 286a | RQGPKEPFRDY |
| 49c | GLLETSSGCRQ  | 286b | KQGPKEPFRDY |
| 49d | GLLETSEGCKQ  | 287  | QGPKEPFRDYV |
| 50a | LLETSEGCRQI  | 288  | GPKEPFRDYVD |
| 50b | LLETAEGCRQI  | 289  | PKEPFRDYVDR |
| 50c | LLETSSGCRQI  | 290  | KEPFRDYVDRF |
| 50d | LLETSEGCKQI  | 291  | EPFRDYVDRFY |
| 51a | LETSEGCRQIL  | 292  | PFRDYVDRFYK |
| 51b | LETAEGCRQIL  | 293  | FRDYVDRFYKT |
| 51c | LETSSGCRQIL  | 294  | RDYVDRFYKTL |
| 52a | ETSEGCRQILG  | 295  | DYVDRFYKTLR |
| 52b | ETAEGCRQILG  | 296  | YVDRFYKTLRA |
| 52c | ETSEGCRQILE  | 297  | VDRFYKTLRAE |
| 53a | TSEGCRQILGQ  | 298  | DRFYKTLRAEQ |
| 53b | TAEGCRQILGQ  | 299  | RFYKTLRAEQA |
| 53c | TSEGCRQILEQ  | 300a | FYKTLRAEQAS |
| 54a | SEGCRQILGQL  | 300b | FYKTLRAEQAT |
| 54b | AEGCRQILGQL  | 301a | YKTLRAEQASQ |
| 54c | SEGCRQILEQL  | 301b | YKTLRAEQATQ |
| 55a | EGCRQILGQLQ  | 302a | KTLRAEQASQE |
| 55b | EGCRQILEQLQ  | 302b | KTLRAEQASQD |
| 56a | GCRQILGQLQP  | 302c | KTLRAEQATQE |
| 56b | GCRQILEQLQP  | 303a | TLRAEQASQEV |
| 57a | CRQILGQLQPS  | 303b | TLRAEQASQDV |
| 57b | CRQILGQLQPA  | 303c | TLRAEQATQEV |
| 57c | CRQILEQLQPS  | 304a | LRAEQASQEVK |
| 58a | RQILGQLQPSL  | 304b | LRAEQASQDVK |
| 58b | RQILGQLQPAL  | 304c | LRAEQATQEVK |
| 58c | RQILEQLQPSL  | 305a | RAEQASQEVKN |
| 59a | QILGQLQPSLQ  | 305b | RAEQASQDVKN |
| 59b | QILGQLQPALQ  | 305c | RAEQATQEVKN |
| 59c | QILEQLQPSLQ  | 306a | AEQASQEVKNW |
| 60a | ILGQLQPSLQT  | 306b | AEQASQDVKNW |
| 60b | ILGQLQPALQT  | 306c | AEQATQEVKNW |
| 60c | ILEQLQPSLQT  | 307a | EQASQEVKNWM |
| 61a | LGQLQPSLQTG  | 307b | EQASQDVKNWM |

**Supplemental Table 1: Peptides and variants tested.**

|     |             |      |              |
|-----|-------------|------|--------------|
| 61b | LGQLQPALQTG | 307c | EQATQEVKNWM  |
| 61c | LEQLQPSLQTG | 308a | QASQEVKNWMT  |
| 62a | GQLQPSLQTGS | 308b | QASQDVKNWMT  |
| 62b | GQLQPALQTGS | 308c | QATQEVKNWMT  |
| 62c | EQLQPSLQTGS | 309a | ASQEVKNWMTTE |
| 63a | QLQPSLQTGSE | 309b | ASQDVKNWMTTE |
| 63b | QLQPALQTGSE | 309c | ATQEVKNWMTTE |
| 64a | LQPSLQTGSEE | 310a | SQEVKNWMTTET |
| 64b | LQPALQTGSEE | 310b | SQDVKNWMTTET |
| 65a | QPSLQTGSEEL | 310c | TQEVKNWMTTET |
| 65b | QPALQTGSEEL | 311a | QEVKNWMTTETL |
| 66a | PSLQTGSEELK | 311b | QDVKNWMTTETL |
| 66b | PSLQTGSEELR | 312a | EVKNWMTTETLL |
| 66c | PALQTGSEELR | 312b | DVKNWMTTETLL |
| 66d | PALQTGSEELK | 313  | VKNWMTTETLLV |
| 67a | SLQTGSEELKS | 314  | KNWMTTETLLVQ |
| 67b | SLQTGSEELRS | 315  | NWMTTETLLVQN |
| 67c | ALQTGSEELRS | 316a | WMTTETLLVQNA |
| 67d | ALQTGSEELKS | 316b | WMTTETLLVQNS |
| 68a | LQTGSEELKSL | 317a | MTTETLLVQNaN |
| 68b | LQTGSEELRSL | 317b | MTTETLLVQNSN |
| 69a | QTGSEELKSLY | 318a | TETLLVQNaNP  |
| 69b | QTGSEELRSLY | 318b | TETLLVQNSNP  |
| 69c | QTGSEELKSLF | 319a | ETLLVQNaNPD  |
| 69d | QTGSEELRSLF | 319b | ETLLVQNSNPD  |
| 70a | TGSEELKSLYN | 320a | TLLVQNaNPDC  |
| 70b | TGSEELRSLYN | 320b | TLLVQNSNPDC  |
| 70c | TGSEELKSLFN | 321a | LLVQNaNPDCK  |
| 70d | TGSEELRSLFN | 321b | LLVQNSNPDCCK |
| 71a | GSEELKSLYNT | 322a | LVQNaNPDCKT  |
| 71b | GSEELRSLYNT | 322b | LVQNSNPDCCKT |
| 71c | GSEELKSLFNT | 323a | VQNaNPDCKTI  |
| 71d | GSEELRSLFNT | 323b | VQNSNPDCCKTI |
| 72a | SEELKSLYNTV | 324a | QNaNPDCKTIL  |
| 72b | SEELRSLYNTV | 324b | QNSNPDCCKTIL |
| 72c | SEELKSLFNTV | 325a | NANPDCKTILK  |
| 72d | SEELRSLFNTV | 325b | NSNPDCCKTILK |
| 72e | SEELKSLYNTI | 326a | ANPDCKTILKA  |
| 72f | SEELRSLYNTI | 326b | SNPDCKTILKA  |
| 73a | EELKSLYNTVA | 327  | NPDCCKTILKAL |
| 73b | EELRSLYNTVA | 328  | PDCKTILKALG  |
| 73c | EELKSLFNTVA | 329  | DCKTILKALGP  |
| 73d | EELRSLFNTVA | 330a | CKTILKALGPA  |
| 73e | EELKSLYNTIA | 330b | CKTILKALGPG  |
| 73f | EELRSLYNTIA | 331a | KTILKALGPAA  |
| 74a | ELKSLYNTVAT | 331b | KTILKALGPGA  |
| 74b | ELKSLYNTIAV | 332a | TILKALGPAAT  |
| 74c | ELKSLYNTVAV | 332b | TILKALGPGAT  |
| 74d | ELRSLYNTVAT | 333a | ILKALGPAATL  |
| 74e | ELKSLFNTVAT | 333b | ILKALGPGATL  |
| 74f | ELRSLFNTVAT | 334a | LKALGPAATLE  |

**Supplemental Table 1: Peptides and variants tested.**

|     |             |      |             |
|-----|-------------|------|-------------|
| 75a | LKSLYNTVATL | 334b | LKALGPGATLE |
| 75b | LRSLYNTVATL | 335a | KALGPAATLEE |
| 75c | LKSLFNTVATL | 335b | KALGPGATLEE |
| 75d | LKSLYNTVAVL | 336a | ALGPAATLEEM |
| 75e | LKSLYNTIAVL | 336b | ALGPGATLEEM |
| 75f | LRSLFNTVATL | 337a | LGPAATLEEMM |
| 76a | RSLYNTVATLY | 337b | LGPGATLEEMM |
| 76b | KSLYNTVATLY | 338a | GPAATLEEMMT |
| 76c | KSLFNTVATLY | 338b | GPGATLEEMMT |
| 76d | KSLYNTVAVLY | 339a | PAATLEEMMTA |
| 76e | RSLFNTVATLY | 339b | PGATLEEMMTA |
| 76f | RSLYNTVAVLY | 340a | AATLEEMMTAC |
| 76g | KSLYNTIAVLY | 340b | GATLEEMMTAC |
| 77a | SLYNTVATLYC | 341  | ATLEEMMTACQ |
| 77b | SLFNTVATLYC | 342  | TLEEMMTACQG |
| 77c | SLYNTVAVLYC | 343  | LEEMMTACQGV |
| 77d | SLYNTIAVLYC | 344  | EEMMTACQGVG |
| 77e | SLFNTVAVLYC | 345  | EMMTACQGVGG |
| 77f | SLYNTIATLYC | 346  | MMTACQGVGGP |
| 78a | LYNTVATLYCV | 347a | MTACQGVGGPG |
| 78b | LFNTVATLYCV | 347b | MTACQGVGGPS |
| 78c | LYNTVAVLYCV | 348a | TACQGVGGPGH |
| 78d | LYNTIAVLYCV | 348b | TACQGVGGPSH |
| 78e | LFNTVAVLYCV | 349a | ACQGVGGPGHK |
| 78f | LYNTIATLYCV | 349b | ACQGVGGPSHK |
| 79a | YNTVATLYCVH | 350a | CQGVGGPGHKA |
| 79b | FNTVATLYCVH | 350b | CQGVGGPSHKA |
| 79c | YNTVAVLYCVH | 351a | QGVGGPGHKAR |
| 79d | YNTIAVLYCVH | 351b | QGVGGPSHKAR |
| 79e | FNTVAVLYCVH | 352a | GVGPGHKARV  |
| 79f | YNTIATLYCVH | 352b | GVGGPSHKARV |
| 80a | NTVATLYCVHQ | 352c | GVGGPSHKARI |
| 80b | NTVAVLYCVHQ | 353a | VGGPGHKARVL |
| 80c | NTIAVLYCVHQ | 353b | VGGPSHKARVL |
| 80d | NTIATLYCVHQ | 353c | VGGPSHKARIL |
| 81a | TVATLYCVHQR | 354a | GGPGHKARVLA |
| 81b | TVATLYCVHQK | 354b | GGPSHKARVLA |
| 81c | TVAVLYCVHQR | 354c | GGPSHKARILA |
| 81d | TIAVLYCVHQR | 355a | GPGHKARVLAE |
| 81e | TVAVLYCVHQK | 355b | GPSHKARVLAE |
| 82a | VATLYCVHQRI | 355c | GPSHKARILAE |
| 82b | VATLYCVHQKI | 356a | PGHKARVLAEA |
| 82c | VAVLYCVHQRI | 356b | PSHKARVLAEA |
| 82d | IAVLYCVHQRI | 356c | PSHKARILAEA |
| 82e | VAVLYCVHQKI | 357a | GHKARVLAEAM |
| 83a | ATLYCVHQRIE | 357b | SHKARVLAEAM |
| 83b | ATLYCVHQKIE | 357c | SHKARILAEAM |
| 83c | AVLYCVHQRIE | 358a | HKARVLAEAMS |
| 83d | ATLYCVHQRID | 358b | HKARILAEAMS |
| 83e | ATLYCVHQKID | 359a | KARVLAEAMSQ |
| 83f | AVLYCVHQRID | 359b | KARILAEAMSQ |

**Supplemental Table 1: Peptides and variants tested.**

|     |             |      |             |
|-----|-------------|------|-------------|
| 83g | AVLYCVHQKIE | 360a | ARVLAEAMSQV |
| 84a | TLYCVHQRIEI | 360b | ARVLAEAMSQA |
| 84b | TLYCVHQRIDV | 360c | ARILAEAMSQV |
| 84c | TLYCVHQKIEV | 361a | RVLAEAMSQVT |
| 84d | TLYCVHQKIDV | 361b | RVLAEAMSQAT |
| 84e | VLYCVHQRIEV | 361c | RILAEAMSQVT |
| 84f | TLYCVHQRIEV | 361d | RVLAEAMSQTS |
| 84g | VLYCVHQRIDV | 362a | VLAEAMSQVTN |
| 85a | LYCVHQRIDVK | 362b | VLAEAMSQATN |
| 85b | LYCVHQRIEIK | 362c | ILAEAMSQVTN |
| 85c | LYCVHQRIEVK | 362d | VLAEAMSQVTS |
| 85d | LYCVHQKIEVK | 363a | LAEAMSQVTNS |
| 85e | LYCVHQKIDVK | 363b | LAEAMSQVTNP |
| 86a | YCVHQRIDVKD | 364a | AEAMSQVTNSA |
| 86b | YCVHQRIEIKD | 364b | AEAMSQVTNPA |
| 86c | YCVHQRIEVKD | 365  | EAMSQVTNSAT |
| 86d | YCVHQKIEVKD | 366  | AMSQVTNSATI |
| 86e | YCVHQKIDVKD | 367  | MSQVTNSATIM |
| 87a | CVHQRIDVKDT | 368  | SQVTNSATIMM |
| 87b | CVHQRIEIKDT | 369  | QVTNSATIMMQ |
| 87c | CVHQRIEVKDT | 370a | VTNSATIMMQR |
| 87d | CVHQKIEVKDT | 370b | VTNSATIMMQK |
| 87e | CVHQKIDVKDT | 371a | TNSATIMMQRG |
| 88a | VHQRIDVKDTK | 371b | TNSATIMMQKG |
| 88b | VHQRIEIKDTK | 372a | NSATIMMQRGN |
| 88c | VHQRIEVKDTK | 372b | NSATIMMQKGN |
| 88d | VHQKIEVKDTK | 373a | SATIMMQRGNF |
| 88e | VHQKIDVKDTK | 373b | SATIMMQKGNF |
| 89a | HQRIDVKDTKE | 374a | ATIMMQRGNFR |
| 89b | HQRIEVKDTKE | 374b | ATIMMQKGNFR |
| 89c | HQKIEVKDTKE | 375a | TIMMQRGNFRN |
| 89d | HQKIDVKDTKE | 375b | TIMMQKGNFRN |
| 89e | HQRIEIKDTKE | 375c | AIMMQRGNFRN |
| 90a | QRIDVKDTKEA | 376a | IMMQRGNFRNQ |
| 90b | QRIEVKDTKEA | 376b | IMMQKGNFRNQ |
| 90c | QKIEVKDTKEA | 376c | IMMQRGNFKNQ |
| 90d | QKIDVKDTKEA | 376d | VMMQRGNFRNQ |
| 90e | QRIEIKDTKEA | 377a | MMQRGNFRNQ  |
| 91a | RIDVKDTKEAL | 377b | MMQKGNFRNQ  |
| 91b | RIEVKDTKEAL | 377c | MMQRGNFKNQ  |
| 91c | KIEVKDTKEAL | 378a | MQRGNFRNQ   |
| 91d | KIDVKDTKEAL | 378b | MQKGNFRNQ   |
| 91e | RIEIKDTKEAL | 378c | MQRGNFKNQ   |
| 92a | IDVKDTKEALD | 379a | QRGNFRNQ    |
| 92b | IEVKDTKEALD | 379b | QRGNFRNQ    |
| 92c | IEVKDTKEALE | 379c | QKGNFRNQ    |
| 92d | IDVKDTKEALE | 380a | RGNFRNQ     |
| 92e | IEIKDTKEALD | 380b | RGNFRNQ     |
| 92f | IEIKDTKEALE | 380c | KGNFRNQ     |
| 93a | EVKDTKEALDK | 381a | GNFRNQ      |
| 93b | DVKDTKEALDK | 381b | GNFRNQ      |

**Supplemental Table 1: Peptides and variants tested.**

|      |             |      |             |
|------|-------------|------|-------------|
| 93c  | EIKDTKEALDK | 382a | NFRNQKRTVKC |
| 93d  | EVKDTKEALEK | 382b | NFRNQKRVKVC |
| 93e  | DVKDTKEALEK | 383a | FRNQKRTVKCF |
| 93f  | EIKDTKEALEK | 383b | FRNQKRVKCF  |
| 94a  | VKDTKEALDKI | 384a | RNQKRTVKCFN |
| 94b  | IKDTKEALDKI | 384b | RNQKRVKCFN  |
| 94c  | VKDTKEALEKI | 385a | NQKRTVKCFNC |
| 94d  | VRDTKEALDKI | 385b | NQKRVKCFNC  |
| 94e  | IKDTKEALEKI | 386a | QRKTVKCFNCG |
| 95a  | KDTKEALDKIE | 386b | QRKRVKCFNCG |
| 95b  | KDTKEALEKIE | 386c | QRKPVKCFNCG |
| 95c  | RDTKEALDKIE | 387a | RKTVKCFNCGK |
| 96a  | DTKEALDKIEE | 387b | RKRVKCFNCGK |
| 96b  | DTKEALEKIEE | 387c | RKPVKCFNCGK |
| 97a  | TKEALDKIEEE | 388a | KTVKCFNCGKE |
| 97b  | TKEALEKIEEE | 388b | KRVKCFNCGKE |
| 98a  | KEALDKIEEEQ | 389a | TVKCFNCGKEG |
| 98b  | KEALEKIEEEQ | 389b | RVKCFNCGKEG |
| 99a  | EALDKIEEEQN | 389c | TIKCFNCGKEG |
| 99b  | EALEKIEEEQN | 389d | PVKCFNCGKEG |
| 100a | ALDKIEEEQNK | 390a | VKCFNCGKEGH |
| 100b | ALEKIEEEQNK | 390b | IKCFNCGKEGH |
| 101a | LDKIEEEQNK  | 390c | VKCFNCGREGH |
| 101b | LEKIEEEQNK  | 391a | KCFNCGKEGHI |
| 102a | DKIEEEQNKSK | 391b | KCFNCGKEGHL |
| 102b | EKIEEEQNKSK | 391c | KCFNCGREGHI |
| 103a | KIEEEQNKSKK | 392a | CFNCGKEGHIA |
| 103b | KVEEEQNKSKK | 392b | CFNCGKEGHIA |
| 104a | IEEEQNKSKKK | 392c | CFNCGREGHIA |
| 104b | VEEEQNKSKKK | 393a | FNCGKEGHIAR |
| 105a | EEEQNKSKKKA | 393b | FNCGKEGHIAR |
| 105b | EEEQNKCKKKA | 393c | FNCGKEGHLAR |
| 106a | EEQNKSKKKAQ | 394a | NCGKEGHIARN |
| 106b | EEQNKCKKKAQ | 394b | NCGKEGHIARN |
| 107  | EQNKSKKKAQQ | 394c | NCGKEGHLARN |
| 108  | QNKSKKKAQQA | 395a | CGKEGHIARNC |
| 109  | NKSKKKAQQA  | 395b | CGKEGHIARNC |
| 110  | KSKKKAQQA   | 395c | CGKEGHLARNC |
| 111  | SKKKAQQAAD  | 396a | GKEGHIARNCR |
| 112  | KKKAQQAADT  | 396b | GKEGHIARNCR |
| 113  | KKAQQAADTG  | 396c | GKEGHLARNCR |
| 114a | KAQQAADTGN  | 397a | KEGHIARNCR  |
| 114b | KAQQAADTGH  | 397b | KEGHIARNCR  |
| 115a | AQQAADTGNS  | 397c | KEGHLARNCR  |
| 115b | AQQAADTGNN  | 398a | EGHIARNCRAP |
| 115c | AQQAADTGHS  | 398b | EGHIARNCRAP |
| 116a | QQAADTGNSS  | 398c | EGHLARNCRAP |
| 116b | QQAADTGHS   | 399a | GHIARNCRAPR |
| 117a | QQAADTGNSQ  | 399b | GHIARNCRAPR |
| 117b | QQAADTGHSQ  | 399c | GHLARNCRAPR |
| 118a | AAADTGNSQV  | 400a | HIARNCRAPRK |



**Supplemental Table 1: Peptides and variants tested.**

|      |              |      |             |
|------|--------------|------|-------------|
| 118b | AAADTGHSSQV  | 400b | HIAKNCRAPRK |
| 119a | AADTGNSSQVS  | 400c | HLARNCRAPRK |
| 119b | AADTGNNSQVS  | 401a | IARNCRAPRKK |
| 119c | AADTGHSSQVS  | 401b | IAKNCRAPRKK |
| 120a | ADTGNSSQVSQ  | 401c | IAKNCRAPRKR |
| 120b | ADTGNNSQVSQ  | 401d | IARNCRAPRKR |
| 120c | ADTGHSSQVSQ  | 402a | ARNCRAPRKKG |
| 121a | DTGNSSQVSQN  | 402b | AKNCRAPRKKG |
| 121b | DTGNNSQVSQN  | 402c | AKNCRAPRKRK |
| 121c | DTGHSSQVSQN  | 402d | ARNCRAPRKRK |
| 122a | TGNSSQVSQNY  | 403a | RNCRAPRKKGC |
| 122b | TGNNSQVSQNY  | 403b | KNCRAPRKKGC |
| 122c | TGHSSQVSQNY  | 403c | KNCRAPRKRGC |
| 123a | GNSSQVSQNYP  | 403d | RNCRAPRKRGC |
| 123b | GNNNSQVSQNYP | 404a | NCRAPRKKGCW |
| 123c | GHSSQVSQNYP  | 404b | NCRAPRKRGCW |
| 124a | NSSQVSQNYPI  | 405a | CRAPRKKGCWK |
| 124b | NNSQVSQNYPI  | 405b | CRAPRKRGCWK |
| 124c | HSSQVSQNYPI  | 406a | RAPRKKGCWKC |
| 125a | SSQVSQNYPIV  | 406b | RAPRKRGCWKC |
| 125b | NSQVSQNYPIV  | 407a | APRKKGCWKC  |
| 126a | SQVSQNYPIVQ  | 407b | APRKRGCWKC  |
| 126b | NQVSQNYPIVQ  | 408a | PRKKGCWKC   |
| 127  | QVSQNYPIVQN  | 408b | PRKRGCWKC   |
| 128a | VSQNYPIVQNL  | 408c | PRKGCWKC    |
| 128b | VSQNYPIVQNI  | 409a | RKGCWKC     |
| 128c | VSQNYPIVQNM  | 409b | RKRGCWKC    |
| 129a | SQNYPIVQNLQ  | 409c | RKGCWKC     |
| 129b | SQNYPIVQNIQ  | 410a | KKGCWKC     |
| 129c | SQNYPIVQNMQ  | 410b | KRGCWKC     |
| 130a | QNYPIVQNLQG  | 410c | KKGCWKC     |
| 130b | QNYPIVQNIQG  | 411a | KGCWKC      |
| 130c | QNYPIVQNMQG  | 411b | KGCWKC      |
| 131a | NYPIVQNLQGQ  | 411c | RGCWKC      |
| 131b | NYPIVQNIQGQ  | 412a | GCWKC       |
| 131c | NYPIVQNMQGQ  | 412b | GCWKC       |
| 132a | YPIVQNLQGQM  | 412c | GCWKC       |
| 132b | YPIVQNIQGQM  | 413a | CWKCGKEGHQM |
| 132c | YPIVQNMQGQM  | 413b | CWKCGREGHQM |
| 133a | PIVQNLQGQMV  | 413c | CWKCGQEGHQM |
| 133b | PIVQNIQGQMV  | 414a | WKC         |
| 133c | PIVQNMQGQMV  | 414b | WKC         |
| 134a | IVQNLQGQMVH  | 414c | WKC         |
| 134b | IVQNIQGQMVH  | 415a | KCGKEGHQMKD |
| 134c | IVQNMQGQMVH  | 415b | KCGREGHQMKD |
| 135a | VQNLQGQMVHQ  | 415c | KCGKEGHQMKD |
| 135b | VQNIQGQMVHQ  | 415d | KCGQEGHQMKD |
| 135c | VQNMQGQMVHQ  | 416a | CGKEGHQMKDC |
| 136a | QNLQGQMVHQA  | 416b | CGREGHQMKDC |
| 136b | QNLQGQMVHQ   | 416c | CGKEGHQMKDC |
| 136c | QNIQGQMVHQA  | 416d | CGQEGHQMKDC |

**Supplemental Table 1: Peptides and variants tested.**

|      |               |      |             |
|------|---------------|------|-------------|
| 136d | QNMQGQMVHQAI  | 417a | GKEGHQMKDCT |
| 137a | NLQGQMVHQAI   | 417b | GREGHQMKDCT |
| 137b | NLQGQMVHQPI   | 417c | GKEGHQMKECT |
| 137c | NIQGQMVHQAI   | 417d | GOEGHQMKDCT |
| 137d | NLQGQMVHQAL   | 418a | KEGHQMKDCTE |
| 137e | NMQGQMVHQAI   | 418b | REGHQMKDCTE |
| 138a | LQGQMVHQAIS   | 418c | KEGHQMKECTE |
| 138b | LQGQMVHQPIS   | 419a | EGHQMKDCTER |
| 138c | IQGQMVHQAIS   | 419b | EGHQMKECTER |
| 138d | LQGQMVHQALS   | 420a | GHQMKDCTERQ |
| 138e | MQGQMVHQAIS   | 420b | GHQMKECTERQ |
| 139a | QGQMVHQAIISP  | 421a | HQMKDCTERQA |
| 139b | QGQMVHQPIISP  | 421b | HQMKECTERQA |
| 139c | QGQMVHQALSP   | 422a | QMKDCTERQAN |
| 139d | QGQMVHQPLSP   | 422b | QMKECTERQAN |
| 140a | GQMVHQAIISPR  | 423a | MKDCTERQANF |
| 140b | GQMVHQPIISPR  | 423b | MKECTERQANF |
| 140c | GQMVHQALSPR   | 424a | KDCTERQANFL |
| 140d | GQMVHQPLSPR   | 424b | KECTERQANFL |
| 141a | QMVHQAIISPRT  | 425a | DCTERQANFLG |
| 141b | QMVHQPIISPRT  | 425b | ECTERQANFLG |
| 141c | QMVHQALSPRT   | 426  | CTERQANFLGK |
| 141d | QMVHQPLSPRT   | 427  | TERQANFLGKI |
| 142a | MVHQAIISPRTL  | 428  | ERQANFLGKIW |
| 142b | MVHQPIISPRTL  | 429  | RQANFLGKIWP |
| 142c | MVHQALSPRTL   | 430  | QANFLGKIWPS |
| 142d | MVHQPLSPRTL   | 431a | ANFLGKIWPSH |
| 143a | VHQAIISPRTLNA | 431b | ANFLGKIWPSY |
| 143b | VHQPIISPRTLNA | 432a | NFLGKIWPSHK |
| 143c | VHQALSPRTLNA  | 432b | NFLGKIWPSYK |
| 143d | VHQPLSPRTLNA  | 433a | FLGKIWPSHKG |
| 144a | HQAIISPRTLNA  | 433b | FLGKIWPSYKG |
| 144b | HQPIISPRTLNA  | 434a | LGKIWPSHKGR |
| 144c | HQALSPRTLNA   | 434b | LGKIWPSYKGR |
| 144d | HQPLSPRTLNA   | 435a | GKIWPSHKGRP |
| 145a | QAISPRTLNAW   | 435b | GKIWPSYKGRP |
| 145b | QPISPRTLNAW   | 436a | KIWPSHKGRPG |
| 145c | QALSPRTLNAW   | 436b | KIWPSYKGRPG |
| 145d | QPLSPRTLNAW   | 437a | IWPSHKGRPGN |
| 146a | AISPRTLNAWV   | 437b | IWPSYKGRPGN |
| 146b | PISPRTLNAWV   | 438a | WPSHKGRPGNF |
| 146c | ALSPRTLNAWV   | 438b | WPSYKGRPGNF |
| 146d | PLSPRTLNAWV   | 439a | PSHKGRPGNFL |
| 147a | ISPRTLNAWVK   | 439b | PSYKGRPGNFL |
| 147b | LSPRTLNAWVK   | 440a | SHKGRPGNFLQ |
| 148  | SPRTLNAWVKV   | 440b | SYKGRPGNFLQ |
| 149a | PRTLNAWVKVV   | 441a | HKGRPGNFLQS |
| 149b | PRTLNAWVKVI   | 441b | YKGRPGNFLQS |
| 150a | RTLNAWVKVVE   | 441c | HKGRPGNFLQN |
| 150b | RTLNAWVKVIE   | 442a | KGRPGNFLQSR |

**Supplemental Table 1: Peptides and variants tested.**

|      |             |      |             |
|------|-------------|------|-------------|
| 151a | TLNAWVKVVEE | 442b | KGRPGNFLQNR |
| 151b | TLNAWVKVIEE | 443a | GRPGNFLQSRP |
| 152a | LNAWVKVVEEK | 443b | GRPGNFLQNRP |
| 152b | LNAWVKVIEEK | 444a | RPGNFLQSRPE |
| 153a | NAWVKVVEEKA | 444b | RPGNFLQNRPE |
| 153b | NAWVKVIEEKA | 445a | PGNFLQSRPEP |
| 154a | AWVKVVEEKAF | 445b | PGNFLQNRPEP |
| 154b | AWVKVIEEKAF | 446a | GNFLQSRPEPT |
| 155a | WVKVVEEKAFS | 446b | GNFLQSRPEPS |
| 155b | WVKVIEEKAFS | 446c | GNFLQNRPEPT |
| 156a | VKVVEEKAFSP | 447a | NFLQSRPEPTA |
| 156b | VKVIEEKAFSP | 447b | NFLQSRPEPSA |
| 157a | KVVEEKAFSPE | 447c | NFLQNRPEPTA |
| 157b | KVIEEKAFSPE | 448a | FLQSRPEPTAP |
| 158a | VVEEKAFSPEV | 448b | FLQSRPEPSAP |
| 158b | VIEEKAFSPEV | 448c | FLQNRPEPTAP |
| 159a | VEEKAFSPEVI | 449a | LQSRPEPTAPP |
| 159b | IEEKAFSPEVI | 449b | LQSRPEPSAPP |
| 160  | EKAFSPEVIP  | 449c | LQNRPEPTAPP |
| 161  | EKAFSPEVIPM | 450a | QSRPEPTAPPE |
| 162  | KAFSPEVIPMF | 450b | QSRPEPTAPPA |
| 163a | AFSPEVIPMFS | 450c | QSRPEPSAPPE |
| 163b | AFSPEVIPMFT | 450d | QNRPEPTAPPE |
| 164a | FSPEVIPMFSA | 451a | SRPEPTAPPEE |
| 164b | FSPEVIPMFTA | 451b | SRPEPTAPPAE |
| 165a | SPEVIPMFSAL | 451c | SRPEPSAPPEE |
| 165b | SPEVIPMFTAL | 451d | NRPEPTAPPEE |
| 166a | PEVIPMFSALS | 452a | RPEPTAPPEES |
| 166b | PEVIPMFTALS | 452b | RPEPSAPPEES |
| 166c | PEVIPMFAALS | 452c | RPEPTAPPAES |
| 167a | EVIPMFSALSE | 453a | PEPTAPPEESF |
| 167b | EVIPMFTALSE | 453b | PEPSAPPEESF |
| 167c | EVIPMFAALSE | 453c | PEPTAPPAESF |
| 168a | VIPMFSALSEG | 454a | EPTAPPEESFR |
| 168b | VIPMFTALSEG | 454b | EPSAPPEESFR |
| 168c | VIPMFAALSEG | 454c | EPTAPPAESFR |
| 169a | IPMFSALSEGA | 455a | PTAPPEESFRF |
| 169b | IPMFTALSEGA | 455b | PSAPPEESFRF |
| 169c | IPMFAALSEGA | 455c | PTAPPAESFRF |
| 170a | PMFSALSEGAT | 455d | PTAPPEESFRS |
| 170b | PMFTALSEGAT | 456a | TAPPEESFRFG |
| 170c | PMFAALSEGAT | 456b | SAPPEESFRFG |
| 171a | MFSALSEGATP | 456c | TAPPAESFRFG |
| 171b | MFTALSEGATP | 456d | TAPPEESFRSG |
| 171c | MFAALSEGATP | 457a | APPEESFRFGE |
| 172a | FSALSEGATPQ | 457b | APPAESFRFGE |
| 172b | FTALSEGATPQ | 457c | APPEESFRSGV |
| 172c | FAALSEGATPQ | 458a | PPEESFRFGEE |
| 172d | FSALAEGATPQ | 458b | PPAESFRFGEE |
| 173a | SALSEGATPQD | 458c | PPEESFRSGVE |
| 173b | TALSEGATPQD | 459a | PEESFRFGEE  |

**Supplemental Table 1: Peptides and variants tested.**

|      |             |      |              |
|------|-------------|------|--------------|
| 173c | AALSEGATPQD | 459b | PAESFRFGEET  |
| 174a | ALSEGATPQDL | 459c | PEESFRSGVET  |
| 174b | ALAEGATPQDL | 460a | EESFRFGEETT  |
| 175a | LSEGATPQDLN | 460b | EESFRFGEETA  |
| 175b | LAEGATPQDLN | 460c | AESFRFGEETT  |
| 176  | SEGATPQDLNT | 460d | EESFRSGVETT  |
| 177  | EGATPQDLNTM | 461a | ESFRFGEETTT  |
| 178  | GATPQDLNTML | 461b | ESFRFGEETAT  |
| 179  | ATPQDLNTMLN | 461c | ESFRSGVETTT  |
| 180  | TPQDLNTMLNT | 462a | SFRFGEETTPP  |
| 181  | PQDLNTMLNTV | 462b | SFRFGEETATP  |
| 182  | QDLNTMLNTVG | 462c | SFRSGVETTPP  |
| 183  | DLNTMLNTVGG | 463a | FRFGEETTPPS  |
| 184  | LNTMLNTVGGH | 463b | FRFGEETTPPP  |
| 185  | NTMLNTVGGHQ | 463c | FRFGEETATPP  |
| 186  | TMLNTVGGHQA | 464a | RFGEETTPPSQ  |
| 187  | MLNTVGGHQA  | 464b | RFGEETTPPPQ  |
| 188  | LNTVGGHQAAM | 464c | RFGEETATPPQ  |
| 189  | NTVGGHQAAMQ | 465a | FGEETTPPSQK  |
| 190  | TVGGHQAAMQM | 465b | FGEETTPPPQK  |
| 191  | VGGHQAAMQML | 465c | FGEETATPPQK  |
| 192  | GGHQAAMQMLK | 466a | GEETTPPSQKQ  |
| 193  | GHQAAMQMLKE | 466b | GEETTPPPQKQ  |
| 194  | HQAAMQMLKET | 466c | GEETATPPQKQ  |
| 195  | QAAMQMLKETI | 467a | EETTPPSQKQE  |
| 196a | AAMQMLKETIN | 467b | EETTPPPQKQE  |
| 196b | AAMQMLKDTIN | 468a | ETTPPSQKQEP  |
| 197a | AMQMLKETINE | 468b | ETTPPPQKQEP  |
| 197b | AMQMLKDTINE | 469a | TTTPPSQKQEP  |
| 198a | MQMLKETINEE | 469b | TTTPPPQKQEP  |
| 198b | MQMLKDTINEE | 470a | TTPPSQKQEPID |
| 199a | QMLKETINEEA | 470b | TTPPPQKQEPID |
| 199b | QMLKDTINEEA | 471a | TPSQKQEPIDK  |
| 200a | MLKETINEEAA | 471b | TPPPQKQEPIDK |
| 200b | MLKDTINEEAA | 472a | PSQKQEPIDKE  |
| 201a | LKETINEEAAE | 472b | PPQKQEPIDKE  |
| 201b | LKDTINEEAAE | 473a | SQKQEPIDKEL  |
| 202a | KETINEEAAEW | 473b | PQKQEPIDKEL  |
| 202b | KDTINEEAAEW | 474  | QKQEPIDKELY  |
| 203a | ETINEEAAEWD | 475  | KQEPIDKELYP  |
| 203b | DTINEEAAEWD | 476  | QEPIDKELYPL  |
| 204  | TINEEAAEWD  | 477a | EPIDKELYPLA  |
| 205a | INEEAAEWDRL | 477b | EPIDKELYPLT  |
| 205b | INEEAAEWD   | 478a | PIDKELYPLAS  |
| 206a | NEEAAEWDRLH | 478b | PIDKELYPLTS  |
| 206b | NEEAAEWD    | 479a | IDKELYPLASL  |
| 207a | EAAEWDRLHP  | 479b | IDKELYPLTSL  |
| 207b | EAAEWD      | 480a | DKELYPLASLK  |
| 208a | EAAEWD      | 480b | DKELYPLASLR  |

**Supplemental Table 1: Peptides and variants tested.**

|      |             |      |             |
|------|-------------|------|-------------|
| 208b | EAAEWDRVHPV | 480c | DKELYPLTSLR |
| 209a | AAEWDRLHPVH | 481a | KELYPLASLKS |
| 209b | AAEWDRLHPVQ | 481b | KELYPLASLRS |
| 209c | AAEWDRVHPVH | 481c | KELYPLTSLRS |
| 210a | AEWDRLHPVHA | 482a | ELYPLASLKSL |
| 210b | AEWDRLHPVQA | 482b | ELYPLASLRS  |
| 210c | AEWDRVHPVHA | 482c | ELYPLTSLRS  |
| 211a | EWDRLHPVHAG | 483a | LYPLASLKS   |
| 211b | EWDRLHPVQAG | 483b | LYPLASLRS   |
| 211c | EWDRVHPVHAG | 483c | LYPLTSLRS   |
| 212a | WDRLHPVHAGP | 483d | LYPLTSLKSL  |
| 212b | WDRLHPVQAGP | 484a | YPLASLRS    |
| 212c | WDRVHPVHAGP | 484b | YPLASLKS    |
| 213a | DRLHPVHAGPI | 484c | YPLTSLRS    |
| 213b | DRLHPVHAGPV | 484d | YPLTSLKSL   |
| 213c | DRLHPVQAGPV | 485a | PLASLRS     |
| 213d | DRVHPVHAGPI | 485b | PLASLKS     |
| 214a | RLHPVHAGPIA | 485c | PLTSLRS     |
| 214b | RLHPVHAGPVA | 485d | PLASLKS     |
| 214c | RLHPVQAGPVA | 485e | PLTSLKSL    |
| 214d | RVHPVHAGPIA | 486a | LASLRS      |
| 215a | LHPVHAGPIAP | 486b | LASLKS      |
| 215b | LHPVHAGPVAP | 486c | LTSLRS      |
| 215c | LHPVQAGPVAP | 486d | LASLKS      |
| 215d | VHPVHAGPIAP | 486e | LTSLKS      |
| 216a | HPVHAGPIAPG | 487a | ASLRS       |
| 216b | HPVHAGPVAPG | 487b | ASLKS       |
| 216c | HPVQAGPVAPG | 487c | TSLRS       |
| 217a | PVHAGPIAPGQ | 487d | ASLKS       |
| 217b | PVHAGPVAPGQ | 487e | TSLKS       |
| 217c | PVQAGPVAPGQ | 488a | SLRS        |
| 218a | VHAGPIAPGQM | 488b | SLKS        |
| 218b | VHAGPVAPGQM | 488c | SLKS        |
| 218c | VQAGPVAPGQM | 488d | SLKS        |
| 219a | HAGPIAPGQMR | 488e | SLRS        |
| 219b | HAGPVAPGQMR | 489a | LRSL        |
| 219c | QAGPVAPGQMR | 489b | LKSL        |
| 219d | QAGPIAPGQIR | 489c | LRSL        |
| 220a | AGPIAPGQMRE | 490a | RSL         |
| 220b | AGPVAPGQMRE | 490b | KSL         |
| 220c | AGPVAPGQMRD | 490c | RSL         |
| 220d | AGPIAPGQIRE |      |             |
| 221a | GPIAPGQMREP |      |             |
| 221b | GPVAPGQMREP |      |             |
| 221c | GPVAPGQMRDP |      |             |
| 221d | GPIAPGQIREP |      |             |

**Supplemental Table 2: Example of Data Analysis**

| Epitope ID | IFN- $\gamma$ SFC/M | IL-2 SFC/M            | DUAL SFC/M | 11mer peptide      |                                             | 11mer Frequency |
|------------|---------------------|-----------------------|------------|--------------------|---------------------------------------------|-----------------|
| 145a       | 770                 | ---                   | ---        | <b>QAISPRTLNAW</b> |                                             | <b>53.10%</b>   |
| 145b       | ---                 | ---                   | ---        | QPISPRTLNAW        |                                             | 17.49%          |
| 145c       | 1050                | ---                   | ---        | <b>QALSPRTLNAW</b> |                                             | <b>14.02%</b>   |
| 145d       | ---                 | ---                   | ---        | QPLSPRTLNAW        |                                             | 5.96%           |
|            |                     | # Variants Recognized |            | 2                  | Sum Frequency of Recognized Variants        | 67.12%          |
|            |                     | # Variants Tested     |            | 4                  | Sum Frequency of Tested Variants            | 90.57%          |
|            |                     | % Variant Recognition |            | 50%                | % Coverage of frequently occurring variants | 74.10%          |

SFC/M=Spot forming Cells/Million PBMC

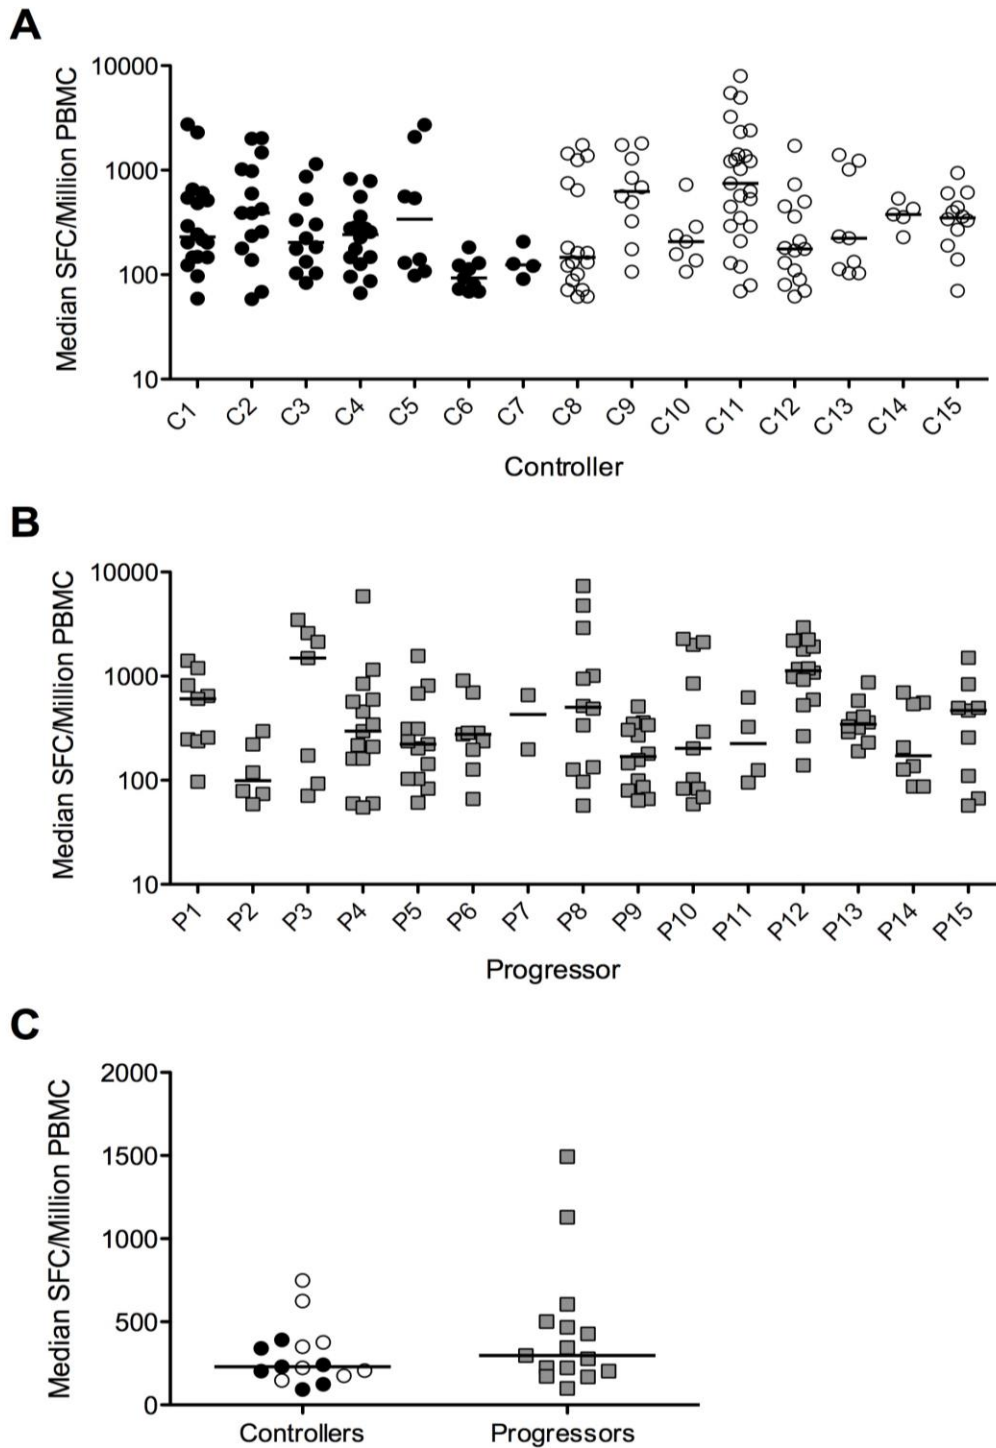

**Supplemental Figure 1: No significant differences in response magnitude between controllers and progressors.** We represented response magnitude (SFC/Million PBMC) by reporting the highest response magnitude to an 11mer peptide

within the targeted epitopic region for A) EC (black circles) and VC (open circles) and B) Progressors (grey squares). C) For each study subject, the median response magnitude was calculated across all targeted epitopic regions and compared between controllers and progressors ( $p=0.36$ ).



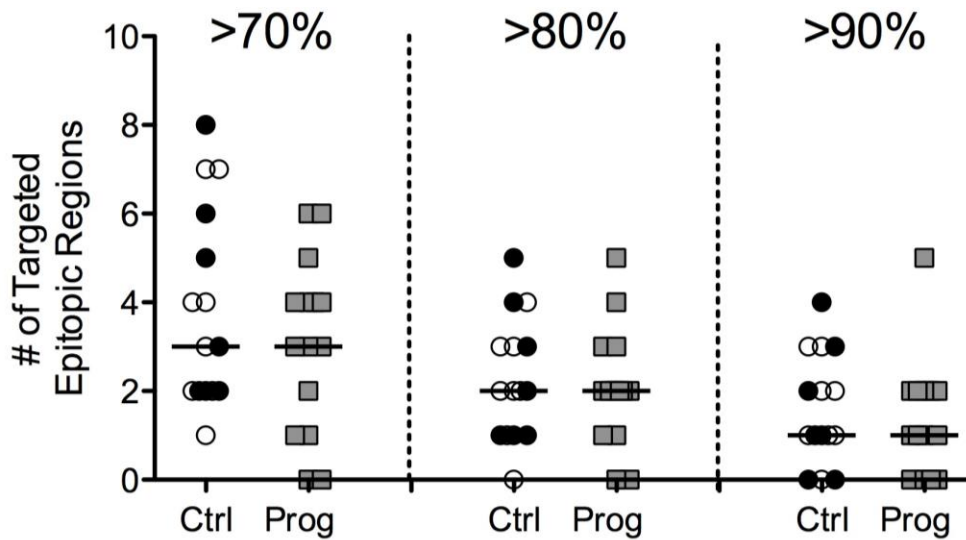

**Supplemental Figure 2: Controllers and progressors similarly targeted conserved epitopes.** Conservation was assessed based on the frequency of a 11mer sequence in the clade B HIVDB sequence alignment used to design the peptide set. A response to a conserved epitopic region reflects the targeting of at least one conserved 11mer peptide within the targeted region. We found no significant differences in the targeting of conserved epitopic regions, regardless of whether the threshold for conservation was set at >70% ( $p=0.47$ ), >80% ( $p=0.74$ ) or >90% ( $p=0.60$ ) of sequences in the alignment.

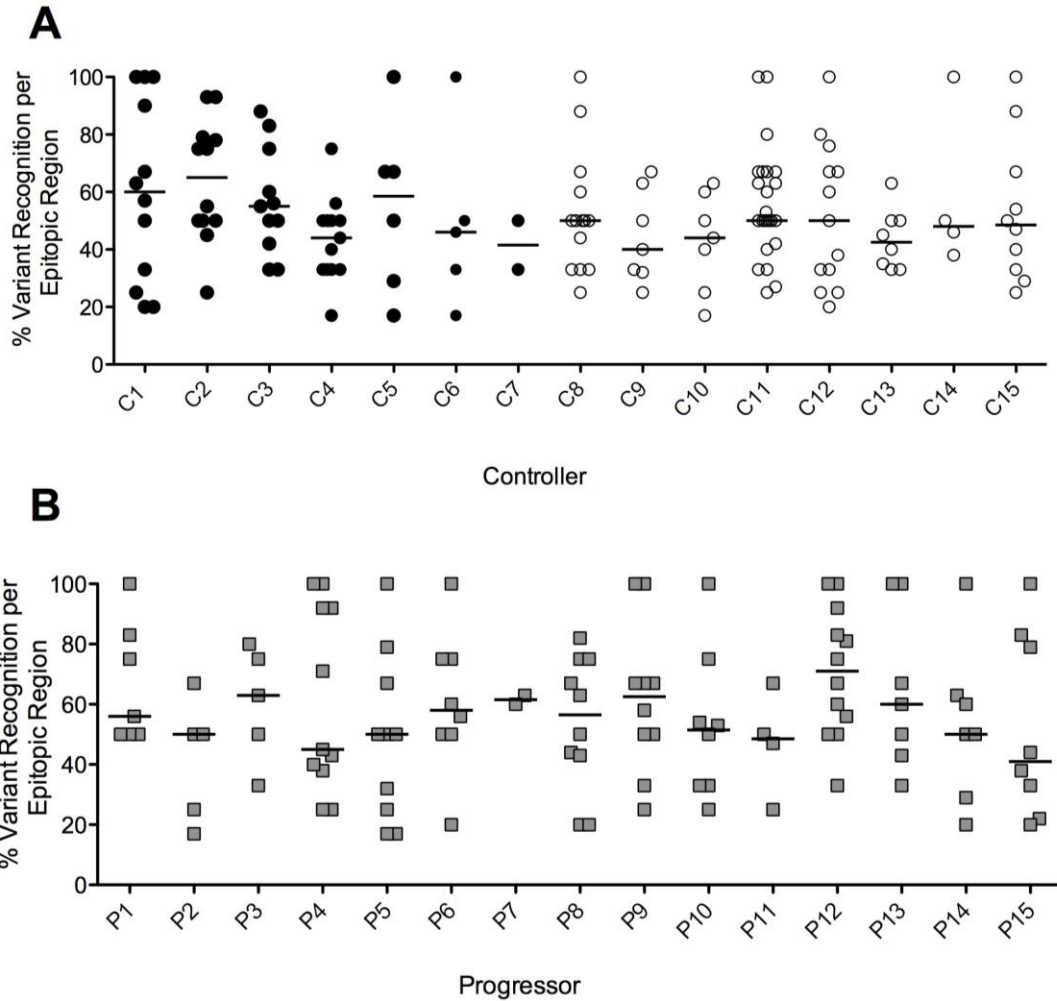

**Supplemental Figure 3: Epitope variant recognition is extensive both within and between individuals.** We determined the percent variant recognition by calculating the number of 11mer variants recognized out of the number of variants tested in each epitopic region for A) EC (black circles) and VC (open circles) and B) Progressors (grey squares). Lines represent median variant recognition across all targeted epitopic regions.

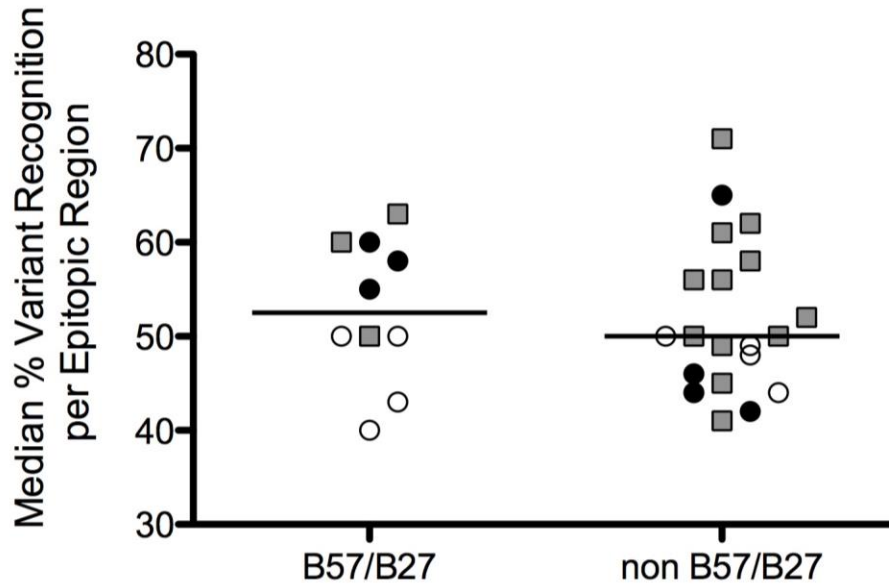

**Supplemental Figure 4: Overall variant recognition is similar between individuals with and without B\*27 and B\*57 alleles.** We observed no difference in median percent variant recognition between study subjects (EC black circles, VC open circles, and progressors grey squares) with and without B\*27 and B\*57 alleles ( $p=0.61$ ). There is no difference between groups even if analysis is restricted to only controllers ( $p=0.45$ ).

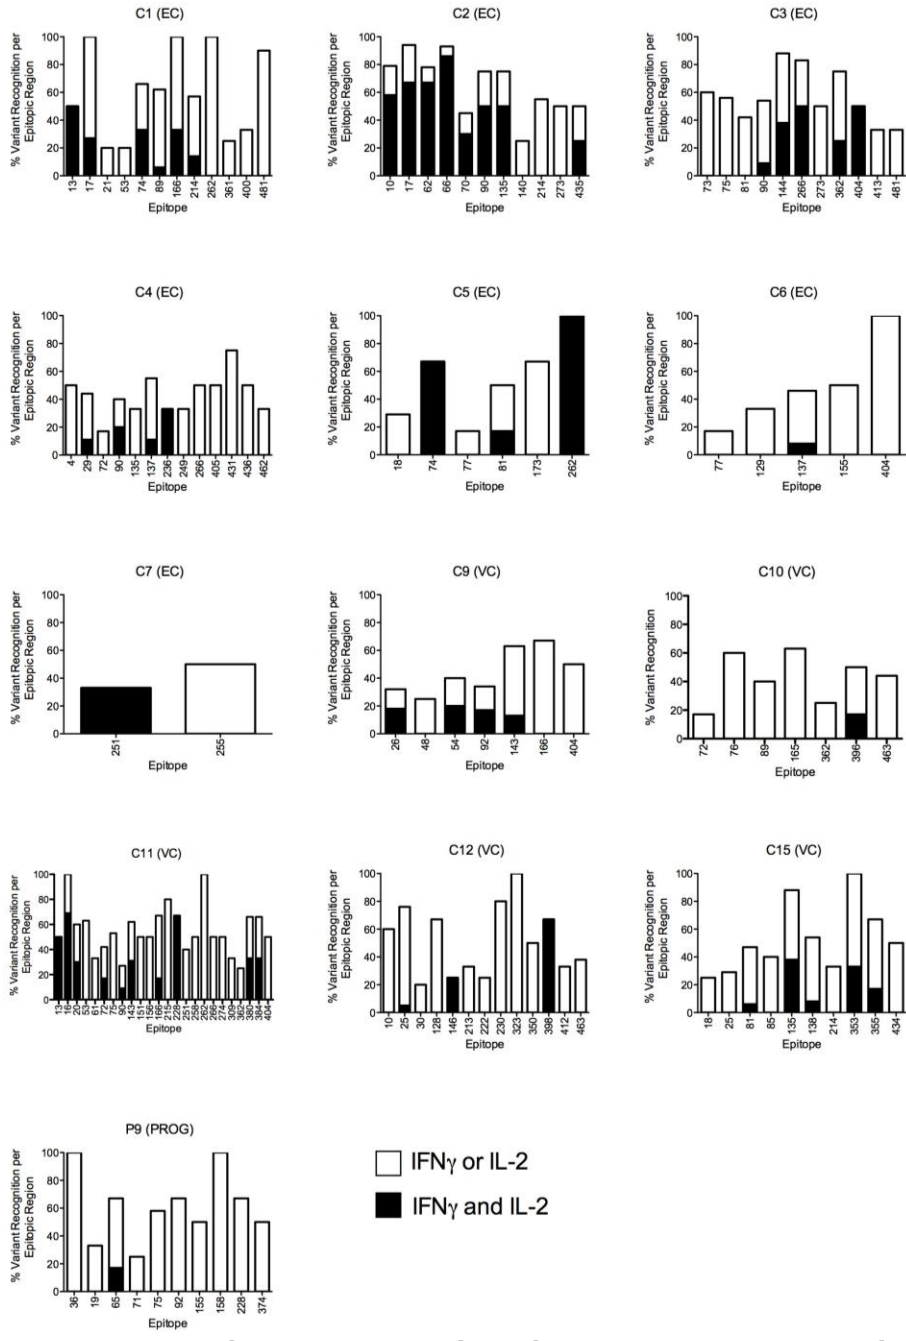

**Supplemental Figure 5: Functionality changes upon variant recognition.** In all study subjects who elicited a dual IFN- $\gamma$ /IL-2 response in an epitopic region, we analyzed how functionality changes upon epitope variation. In each graph, the height of the bars reflect the overall variant recognition in a given targeted epitopic region. The proportion of variants that were recognized via a monofunctional (white, IFN- $\gamma$  or IL-2)

or a polyfunctional (black, IFN- $\gamma$  and IL-2) response is indicated. Polyfunctional responses to all variants were uncommon.

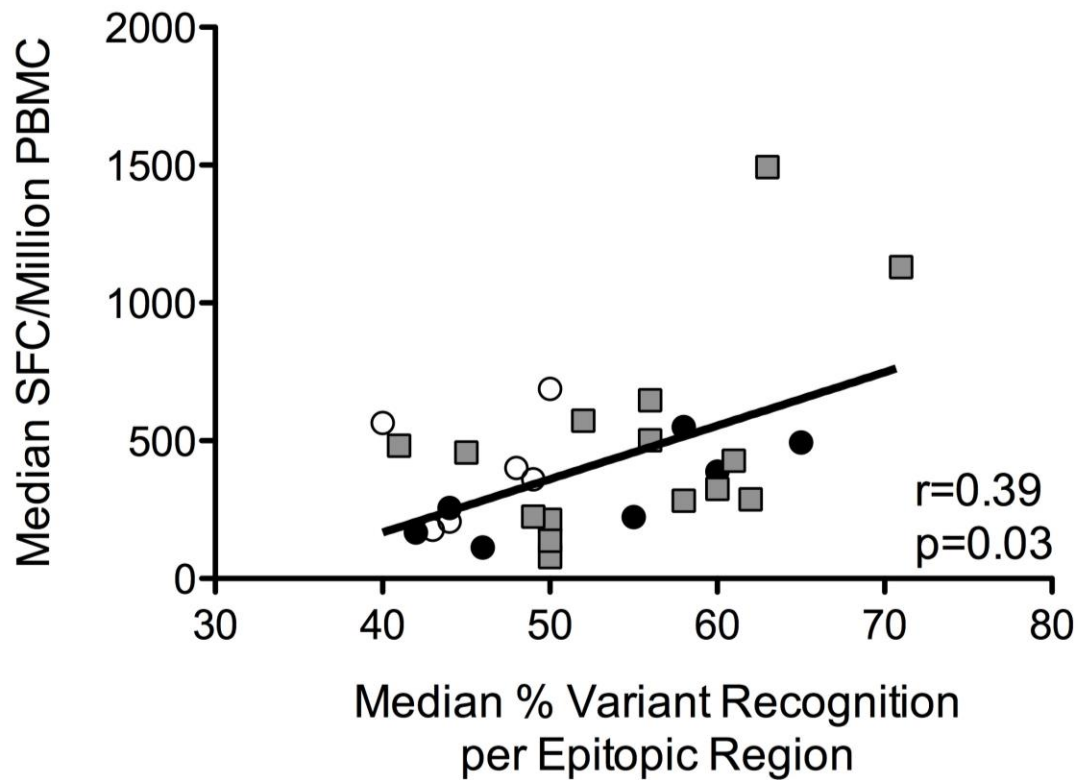

**Supplemental Figure 6: Response magnitude is associated with epitope variant recognition.** Median variant recognition per subject for EC (black circles), VC (open circles) and progressors (grey squares) is shown in relation to median response magnitude (SFC/Million PBMC) of all targeted epitopic regions in which variant recognition was calculated.

**A**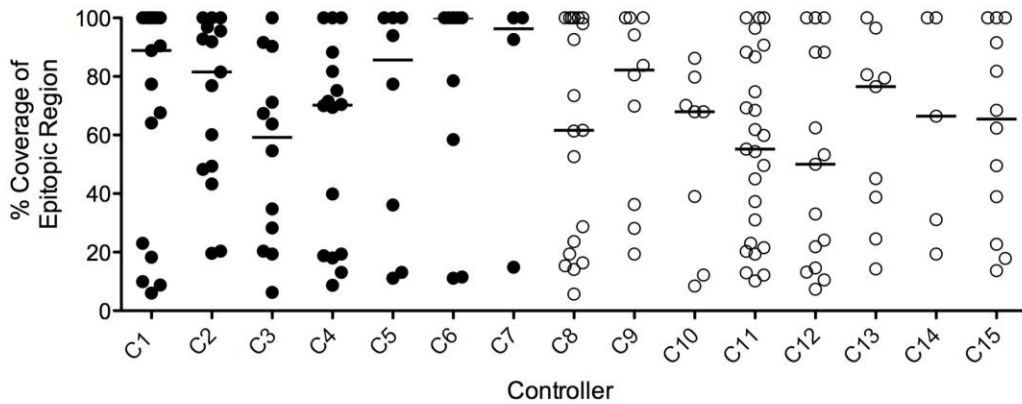**B**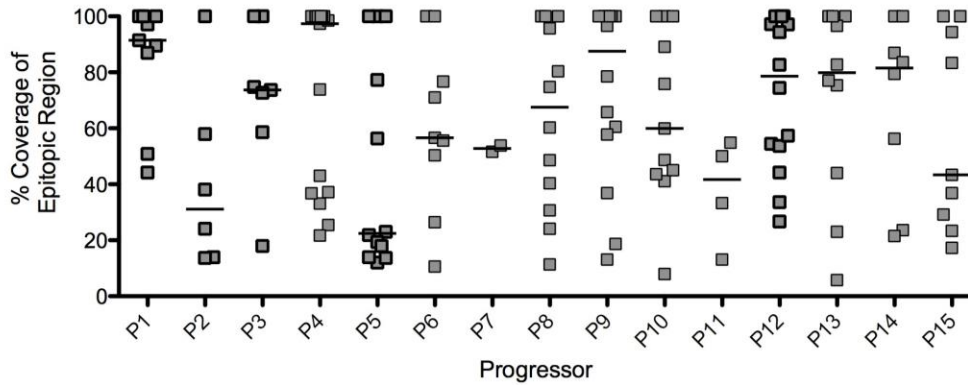

**Supplemental Figure 7: Sequence coverage for all epitopic regions targeted by controllers and progressors.** We determined the sequence coverage for each targeted epitopic region by calculating the sum [frequency targeted 11mers] out of the sum [frequency of tested 11mers] where frequency refers to the proportion of the 11mer sequence in the clade B sequence alignment. Sequence coverage was calculated for A) EC (black circles) and VC (open circles) and B) Progressors (grey squares). Lines represent median coverage across all targeted epitopic regions.

**A**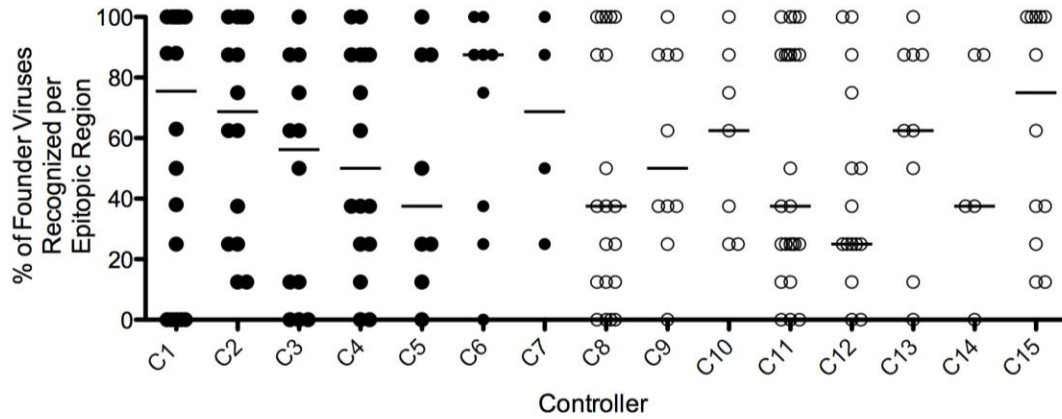**B**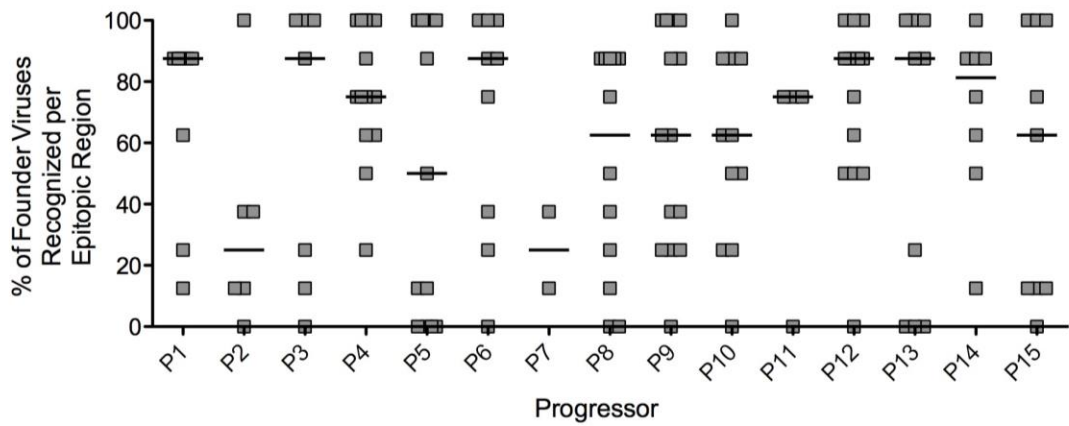

**Supplemental Figure 8: Recognition of founder viruses by controllers and**

**progressors.** We analyzed whether the recognized variants in each targeted epitopic region would match the sequences found in the founder virus panel (n=8). For example, if a person's recognized variants matched 6/8 founder viruses, then the overall recognition would be 75%. The proportion of founder viruses that would be recognized per epitopic region was calculated for A) EC (black circles) and VC (open circles) and B) Progressors (grey squares). Lines represent median percent of founder viruses recognized across all targeted epitopic regions.
